# Supplementary material
Source: PubMed Central journal article supplement (PMC6976570)
Supplement: 41396_2019_544_MOESM1_ESM.pdf [file 41396_2019_544_MOESM1_ESM.pdf]

## Supplementary Figure 1

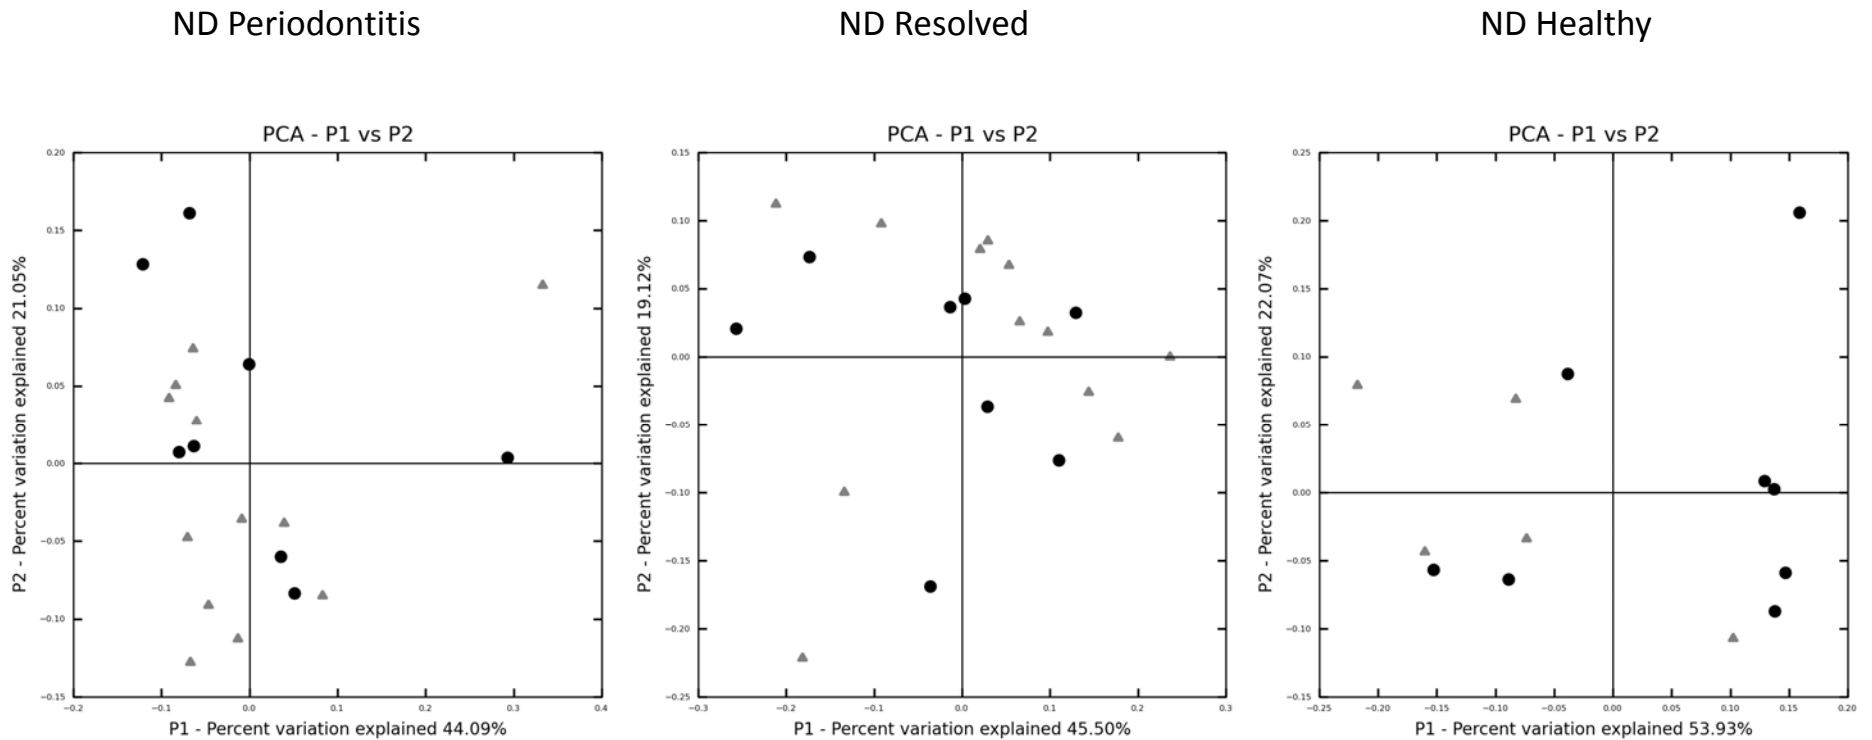

● Samples collected in this study

▲ Samples collected in our previous study (ND Periodontitis and ND resolved) and in the Human Microbiome Project (ND healthy)

Statistics:

ND Periodontitis ( $p = 0.141$ )

ND Resolved ( $p = 0.345$ )

ND Healthy ( $p = 0.176$ )

### Supplementary Figure 1. The subgingival microbiome composition in the ND subjects from this study is consistent with previous studies .

We compared the subgingival microbiome in the ND subjects from this study to those analyzed in our previous study (Shi *et al.*, *mBio* 2015) and in the Human Microbiome Project (The Human Microbiome Project Consortium, *Nature* 2012). All these samples were sequenced using the metagenomic shotgun approach. We found that in each clinical state, the subgingival samples collected in the current study (black) were not significantly different from those collected in previous studies (grey) based on the Weighted UniFrac distance.
