# Supplementary material
Source: PubMed Central journal article supplement (PMC6976570)
Supplement: 41396_2019_544_MOESM2_ESM.pdf [file 41396_2019_544_MOESM2_ESM.pdf]

# Supplementary Figure 2

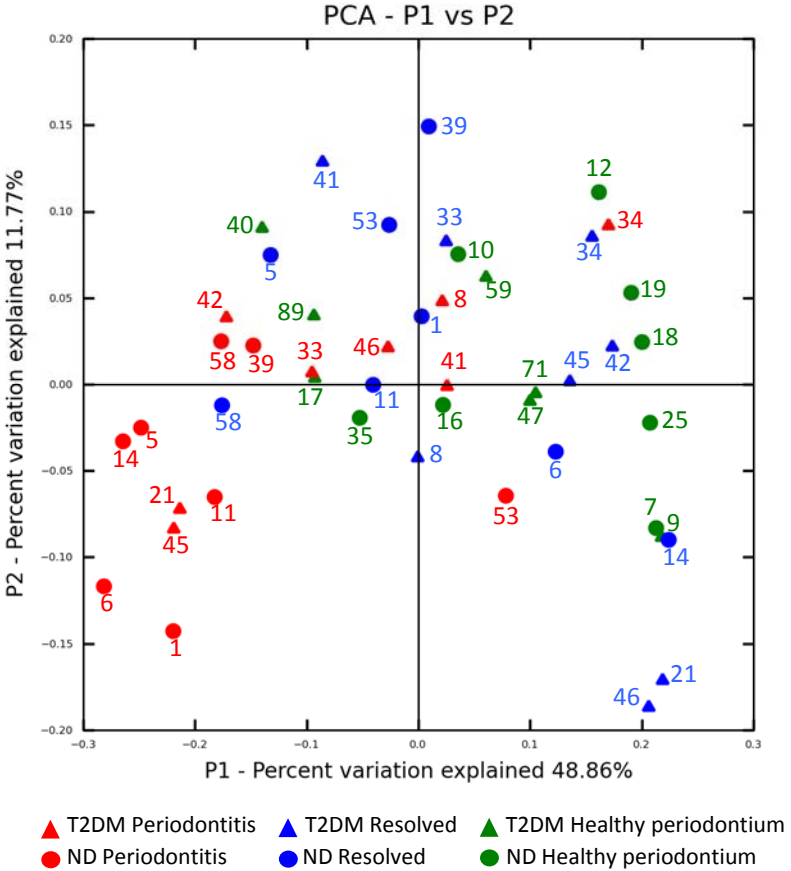

Supplementary Figure 2. The PCoA plot shown in Figure 1 with subject IDs labeled for visualization of related samples.
