# Supplementary material
Source: PubMed Central journal article supplement (PMC6976570)
Supplement: 41396_2019_544_MOESM3_ESM.pdf [file 41396_2019_544_MOESM3_ESM.pdf]

### Supplementary Table 1. List of the species shown in Figure 4

The species are listed in the same order as shown in the heatmaps.

| a) T2DM Periodontitis               | Microbial complex based on Socransky's designation |
|-------------------------------------|----------------------------------------------------|
| <i>Porphyromonas gingivalis</i>     | red                                                |
| <i>Tannerella forsythia</i>         | red                                                |
| <i>Porphyromonas endodontalis</i>   | na                                                 |
| <i>Treponema denticola</i>          | red                                                |
| <i>Treponema medium</i>             | na                                                 |
| <i>Prevotella intermedia</i>        | orange                                             |
| <i>Prevotella tannerae</i>          | na                                                 |
| <i>Selenomonas sputigena</i>        | na                                                 |
| <i>Actinomyces israelii</i>         | na                                                 |
| <i>Prevotella oral taxon 317</i>    | na                                                 |
| <i>Prevotella oris</i>              | na                                                 |
| <i>Veillonella parvula</i>          | purple                                             |
| <i>Actinomyces oral taxon 448</i>   | na                                                 |
| <i>Rothia dentocariosa</i>          | na                                                 |
| <i>Porphyromonas oral taxon 279</i> | na                                                 |
| <i>Fusobacterium nucleatum</i>      | orange                                             |
| <i>Corynebacterium matruchotii</i>  | na                                                 |
| <i>Tannerella oral taxon BU063</i>  | na                                                 |
| <i>Selenomonas noxia</i>            | outlier                                            |
| <i>Actinomyces dentalis</i>         | na                                                 |
| <i>Prevotella nigrescens</i>        | orange                                             |
| <i>Leptotrichia wadei</i>           | na                                                 |
| <i>Actinomyces viscosus</i>         | outlier                                            |
| <i>Actinomyces oral taxon 175</i>   | na                                                 |
| <i>Actinomyces naeslundii</i>       | outlier                                            |
| b) T2DM Resolved                    | Microbial complex based on Socransky's designation |
| <i>Rothia dentocariosa</i>          | na                                                 |
| <i>Rothia aeria</i>                 | na                                                 |
| <i>Porphyromonas oral taxon 279</i> | na                                                 |
| <i>Actinomyces oral taxon 171</i>   | na                                                 |
| <i>Corynebacterium matruchotii</i>  | na                                                 |
| <i>Fusobacterium nucleatum</i>      | orange                                             |

|                                   |         |
|-----------------------------------|---------|
| <i>Veillonella parvula</i>        | purple  |
| <i>Capnocytophaga gingivalis</i>  | green   |
| <i>Corynebacterium durum</i>      | na      |
| <i>Actinomyces viscosus</i>       | outlier |
| <i>Actinomyces oral taxon 175</i> | na      |
| <i>Actinomyces naeslundii</i>     | outlier |
| <i>Actinomyces oris</i>           | na      |
| <i>Streptococcus sanguinis</i>    | yellow  |
| <i>Granulicatella adiacens</i>    | na      |
| <i>Streptococcus oralis</i>       | yellow  |
| <i>Streptococcus gordonii</i>     | yellow  |
| <i>Haemophilus parainfluenzae</i> | na      |

|                 |                                                    |
|-----------------|----------------------------------------------------|
| c) T2DM Healthy | Microbial complex based on Socransky's designation |
|-----------------|----------------------------------------------------|

|                                    |         |
|------------------------------------|---------|
| <i>Actinomyces oral taxon 448</i>  | na      |
| <i>Veillonella parvula</i>         | purple  |
| <i>Corynebacterium matruchotii</i> | na      |
| <i>Selenomonas noxia</i>           | outlier |
| TM7c                               | na      |
| <i>Streptococcus intermedius</i>   | yellow  |
| <i>Rothia dentocariosa</i>         | na      |
| <i>Streptococcus oralis</i>        | yellow  |
| <i>Rothia aeria</i>                | na      |
| <i>Streptococcus sanguinis</i>     | yellow  |
| <i>Actinomyces viscosus</i>        | outlier |
| <i>Actinomyces oral taxon 175</i>  | na      |
| <i>Capnocytophaga gingivalis</i>   | green   |
| <i>Prevotella oris</i>             | na      |
| <i>Prevotella nigrescens</i>       | orange  |
| <i>Fusobacterium nucleatum</i>     | orange  |
| <i>Prevotella oral taxon 317</i>   | na      |
| <i>Campylobacter gracilis</i>      | orange  |
| <i>Actinomyces dentalis</i>        | na      |
| <i>Tannerella forsythia</i>        | red     |
| <i>Porphyromonas gingivalis</i>    | red     |
| <i>Actinomyces johnsonii</i>       | na      |

|                     |                                                    |
|---------------------|----------------------------------------------------|
| d) ND Periodontitis | Microbial complex based on Socransky's designation |
|---------------------|----------------------------------------------------|

|                              |        |
|------------------------------|--------|
| <i>Prevotella intermedia</i> | orange |
|------------------------------|--------|

|                                      |        |
|--------------------------------------|--------|
| <i>Treponema medium</i>              | na     |
| <i>Porphyromonas endodontalis</i>    | na     |
| <i>Treponema vincentii</i>           | na     |
| <i>Treponema denticola</i>           | red    |
| <i>Tannerella forsythia</i>          | red    |
| <i>Campylobacter rectus</i>          | orange |
| <i>Porphyromonas gingivalis</i>      | red    |
| <i>Filifactor alocis</i>             | na     |
| <i>Corynebacterium matruchotii</i>   | na     |
| <i>Prevotella tannerae</i>           | na     |
| <i>Actinomyces dentalis</i>          | na     |
| <i>Fusobacterium nucleatum</i>       | orange |
| <i>Treponema socranskii</i>          | na     |
| <i>Actinomyces oral taxon 448</i>    | na     |
| <i>Propionibacterium propionicum</i> | na     |
| <i>Prevotella oral taxon 317</i>     | na     |
| <i>Prevotella nigrescens</i>         | orange |
| <i>Dialister invisus</i>             | na     |
| <i>Prevotella denticola</i>          | na     |
| <i>Prevotella veroralis</i>          | na     |
| <i>Veillonella parvula</i>           | purple |

| e) ND Resolved                      | Microbial complex based on Socransky's designation |
|-------------------------------------|----------------------------------------------------|
| <i>Actinomyces viscosus</i>         | outlier                                            |
| <i>Actinomyces oral taxon 175</i>   | na                                                 |
| <i>Actinomyces oris</i>             | na                                                 |
| <i>Actinomyces naeslundii</i>       | outlier                                            |
| <i>Streptococcus gordonii</i>       | yellow                                             |
| <i>Actinomyces oral taxon 171</i>   | na                                                 |
| <i>Rothia aeria</i>                 | na                                                 |
| <i>Rothia dentocariosa</i>          | na                                                 |
| <i>Streptococcus sanguinis</i>      | yellow                                             |
| <i>Streptococcus oralis</i>         | yellow                                             |
| <i>Porphyromonas oral taxon 279</i> | na                                                 |
| <i>Corynebacterium matruchotii</i>  | na                                                 |
| <i>Capnocytophaga gingivalis</i>    | green                                              |
| <i>Kingella oralis</i>              | na                                                 |
| <i>Veillonella parvula</i>          | purple                                             |
| <i>Prevotella denticola</i>         | na                                                 |
| <i>Prevotella oris</i>              | na                                                 |

|                                      |        |
|--------------------------------------|--------|
| <i>Streptococcus intermedius</i>     | yellow |
| <i>Fusobacterium nucleatum</i>       | orange |
| <i>Propionibacterium propionicum</i> | na     |
| <i>Prevotella nigrescens</i>         | orange |
| <i>Porphyromonas endodontalis</i>    | na     |
| <i>Treponema denticola</i>           | red    |
| <i>Treponema medium</i>              | na     |

| f) ND Healthy                      | Microbial complex based on Socransky's designation |
|------------------------------------|----------------------------------------------------|
| <i>Veillonella parvula</i>         | purple                                             |
| <i>Haemophilus parainfluenzae</i>  | na                                                 |
| <i>Streptococcus oralis</i>        | yellow                                             |
| <i>Streptococcus sanguinis</i>     | yellow                                             |
| <i>Rothia aeria</i>                | na                                                 |
| <i>Actinomyces viscosus</i>        | outlier                                            |
| <i>Actinomyces oral taxon 175</i>  | na                                                 |
| <i>Actinomyces massiliensis</i>    | na                                                 |
| <i>Actinomyces naeslundii</i>      | outlier                                            |
| <i>Lautropia mirabilis</i>         | na                                                 |
| <i>Rothia dentocariosa</i>         | na                                                 |
| <i>Streptococcus gordonii</i>      | yellow                                             |
| <i>Actinomyces oral taxon 171</i>  | na                                                 |
| <i>Actinomyces oral taxon 448</i>  | na                                                 |
| <i>Fusobacterium nucleatum</i>     | orange                                             |
| <i>Corynebacterium matruchotii</i> | na                                                 |
| TM7c                               | na                                                 |
| <i>Actinomyces dentalis</i>        | na                                                 |
| <i>Prevotella oral taxon 317</i>   | na                                                 |
| <i>Capnocytophaga granulosa</i>    | na                                                 |
| <i>Actinomyces johnsonii</i>       | na                                                 |
