# Supplementary material
Source: PubMed Central journal article supplement (PMC6976570)
Supplement: 41396_2019_544_MOESM4_ESM.pdf [file 41396_2019_544_MOESM4_ESM.pdf]

**Supplementary Table 2. List of the 373 KO genes with different prevalence among the clinical states and between T2DM and ND**

| KO gene ID | KO genes name                                                                                       | Microbial complex based on Socransky's designation |
|------------|-----------------------------------------------------------------------------------------------------|----------------------------------------------------|
| K01812     | uxaC glucuronate isomerase                                                                          | red complex                                        |
| K01192     | E3.2.1.25, MANBA, manB beta-mannosidase                                                             | red complex                                        |
| K01815     | kdul 4-deoxy-L-threo-5-hexosulose-uronate ketol-isomerase                                           | red complex                                        |
| K10532     | HGSNAT heparan-alpha-glucosaminide N-acetyltransferase                                              | red complex                                        |
| K05989     | ramA alpha-L-rhamnosidase                                                                           | red complex                                        |
| K01194     | TREH, treA, treF alpha,alpha-trehalase                                                              | red complex                                        |
| K00041     | uxaB tagaturonate reductase                                                                         | red complex                                        |
| K01051     | E3.1.1.11 pectinesterase                                                                            | red complex                                        |
| K12500     | tesC thioesterase III                                                                               | red complex                                        |
| K06139     | pqqE pyrroloquinoline quinone biosynthesis protein E                                                | red complex                                        |
| K00096     | araM, egsA glycerol-1-phosphate dehydrogenase [NAD(P)+]                                             | red complex                                        |
| K07115     | rlmJ 23S rRNA (adenine2030-N6)-methyltransferase                                                    | red complex                                        |
| K03568     | tldD TldD protein                                                                                   | red complex                                        |
| K01147     | rnb exoribonuclease II                                                                              | red complex                                        |
| K03215     | rumA 23S rRNA (uracil1939-C5)-methyltransferase                                                     | red complex                                        |
| K03592     | pmbA PmbA protein                                                                                   | red complex                                        |
| K02427     | rlmE, rrmJ, ftsI 23S rRNA (uridine2552-2'-O)-methyltransferase                                      | red complex                                        |
| K02397     | flgL flagellar hook-associated protein 3 FlgL                                                       | red complex                                        |
| K01053     | E3.1.1.17, gnl, RGN gluconolactonase                                                                | red complex                                        |
| K03473     | pdxB erythronate-4-phosphate dehydrogenase                                                          | red complex                                        |
| K01850     | E5.4.99.5 chorismate mutase                                                                         | red complex                                        |
| K11527     | K11527 two-component system, sensor histidine kinase and response regulator                         | red complex                                        |
| K10697     | rpaA two-component system, OmpR family, response regulator RpaA                                     | red complex                                        |
| K02420     | fliQ flagellar biosynthetic protein FliQ                                                            | red complex                                        |
| K06968     | rlmM 23S rRNA (cytidine2498-2'-O)-methyltransferase                                                 | red complex                                        |
| K03214     | yfiF, trmG RNA methyltransferase, TrmH family                                                       | red complex                                        |
| K04770     | lonH Lon-like ATP-dependent protease                                                                | red complex                                        |
| K05979     | comB 2-phosphosulfolactate phosphatase                                                              | red complex                                        |
| K00803     | AGPS, agpS alkyldihydroxyacetonephosphate synthase                                                  | red complex                                        |
| K13403     | MTHFD2 methylenetetrahydrofolate dehydrogenase(NAD+) / 5,10-methenyltetrahydrofolate cyclohydrolase | red complex                                        |
| K02422     | fliS flagellar protein FliS                                                                         | red complex                                        |
| K12343     | SRD5A1 3-oxo-5-alpha-steroid 4-dehydrogenase 1                                                      | red complex                                        |
| K01905     | acdA acetate---CoA ligase (ADP-forming) subunit alpha                                               | red complex                                        |
| K09011     | cimA (R)-citramalate synthase                                                                       | red complex                                        |
| K10976     | ERO1LB ERO1-like protein beta                                                                       | red complex                                        |
| K00274     | MAO, aofH monoamine oxidase                                                                         | red complex                                        |
| K06931     | K06931 uncharacterized protein                                                                      | red complex                                        |
| K00179     | iorA indolepyruvate ferredoxin oxidoreductase, alpha subunit                                        | red complex                                        |
| K01035     | atoA acetate CoA/acetate CoA-transferase beta subunit                                               | red complex                                        |
| K13043     | argF N-succinyl-L-ornithine transcarbamylase                                                        | red complex                                        |
| K03047     | rpoD DNA-directed RNA polymerase subunit D                                                          | red complex                                        |
| K13809     | CMPK2 UMP-CMP kinase 2, mitochondrial                                                               | red complex                                        |
| K09770     | K09770 uncharacterized protein                                                                      | red complex                                        |
| K09768     | K09768 uncharacterized protein                                                                      | red complex                                        |
| K01400     | nprE bacillolysin                                                                                   | red complex                                        |
| K08787     | STE13 dipeptidyl aminopeptidase Ste13                                                               | red complex                                        |
| K08138     | xyIE MFS transporter, SP family, xylose:H+ symportor                                                | red complex                                        |
| K00180     | iorB indolepyruvate ferredoxin oxidoreductase, beta subunit                                         | red complex                                        |
| K07096     | K07096 uncharacterized protein                                                                      | red complex                                        |
| K00729     | ALG5 dolichyl-phosphate beta-glucosyltransferase                                                    | red complex                                        |
| K02852     | wecG, rffM UDP-N-acetyl-D-mannosaminouronate:lipid I N-acetyl-D-mannosaminouronosyltransferase      | red complex                                        |
| K07752     | CPD carboxypeptidase D                                                                              | red complex                                        |
| K08586     | tpr thiol protease                                                                                  | red complex                                        |
| K01213     | E3.2.1.67 galacturan 1,4-alpha-galacturonidase                                                      | red complex                                        |
| K08737     | MSH6 DNA mismatch repair protein MSH6                                                               | red complex                                        |
| K01369     | LGMN legumain                                                                                       | red complex                                        |
| K07762     | PAPPA pappalysin-1                                                                                  | red complex                                        |
| K14128     | mvhG, vhuG, vhcG F420-non-reducing hydrogenase small subunit                                        | red complex                                        |
| K09024     | rutF flavin reductase                                                                               | red complex                                        |
| K12659     | ARG56 N-acetyl-gamma-glutamyl-phosphate reductase / acetylglutamate kinase                          | red complex                                        |
| K03089     | rpoH RNA polymerase sigma-32 factor                                                                 | red complex                                        |
| K00993     | EPT1 ethanolaninephosphotransferase                                                                 | red complex                                        |
| K00608     | pyrBI aspartate carbamoyltransferase                                                                | red complex                                        |
| K01039     | gctA glutaconate CoA-transferase, subunit A                                                         | orange complex                                     |
| K01040     | gctB glutaconate CoA-transferase, subunit B                                                         | orange complex                                     |
| K00437     | hydB [NiFe] hydrogenase large subunit                                                               | orange complex                                     |

|        |                                                                                                      |                       |
|--------|------------------------------------------------------------------------------------------------------|-----------------------|
| K02834 | rbfA ribosome-binding factor A                                                                       | orange complex        |
| K04757 | rsbW serine/threonine-protein kinase RsbW                                                            | orange complex        |
| K07793 | tctA putative tricarboxylic transport membrane protein                                               | orange complex        |
| K01452 | E3.5.1.41 chitin deacetylase                                                                         | orange complex        |
| K13378 | nuoCD NADH-quinone oxidoreductase subunit C/D                                                        | orange complex        |
| K01477 | alc, ALLC allantoinase                                                                               | orange complex        |
| K05591 | dbpA ATP-independent RNA helicase DbpA                                                               | orange complex        |
| K01299 | E3.4.17.19 carboxypeptidase Taa                                                                      | orange complex        |
| K07050 | AARSD1, ALAX misacylated tRNA(Ala) deacylase                                                         | orange complex        |
| K00385 | asrC anaerobic sulfite reductase subunit C                                                           | orange complex        |
| K00929 | buk butyrate kinase                                                                                  | orange complex        |
| K01114 | plc phospholipase C                                                                                  | orange complex        |
| K07000 | K07000 uncharacterized protein                                                                       | orange complex        |
| K03296 | TC.HAE1 hydrophobic/amphiphilic exporter-1 (mainly G- bacteria), HAE1 family                         | orange complex        |
| K01884 | cysS1 cysteinyl-tRNA synthetase, unknown class                                                       | orange complex        |
| K06669 | SMC3, CSPG6 structural maintenance of chromosome 3 (chondroitin sulfate proteoglycan 6)              | orange complex        |
| K09826 | irr Fur family transcriptional regulator, iron response regulator                                    | orange complex        |
| K01858 | INO1, ISYNA1 myo-inositol-1-phosphate synthase                                                       | orange complex        |
| K02850 | waaY, rfaY heptose II phosphotransferase                                                             | orange complex        |
| K01753 | dsdA D-serine dehydratase                                                                            | orange complex        |
| K00551 | PEMT phosphatidylethanolamine/phosphatidyl-N-methylethanolamine N-methyltransferase                  | orange complex        |
| K00830 | AGXT alanine-glyoxylate transaminase / serine-glyoxylate transaminase / serine-pyruvate transaminase | orange complex        |
| K00078 | DHDH dihydrodiol dehydrogenase / D-xylose 1-dehydrogenase (NADP)                                     | orange complex        |
| K01706 | gudD glucarate dehydratase                                                                           | orange complex        |
| K08297 | caiA crotonobetainyl-CoA dehydrogenase                                                               | orange complex        |
| K00030 | IDH3 isocitrate dehydrogenase (NAD+)                                                                 | orange complex        |
| K00685 | ATE1 arginyl-tRNA---protein transferase                                                              | orange complex        |
| K01580 | E4.1.1.15, gadB, gadA, GAD glutamate decarboxylase                                                   | orange complex        |
| K03716 | spkB spore photoproduct lyase                                                                        | orange complex        |
| K05834 | rhtB homoserine/homoserine lactone efflux protein                                                    | orange complex        |
| K05972 | AXE1 acetylxylan esterase                                                                            | orange complex        |
| K00011 | AKR1B aldehyde reductase                                                                             | orange complex        |
| K11931 | pgaB poly-beta-1,6-N-acetyl-D-glucosamine N-deacetylase                                              | orange complex        |
| K02365 | ESP1 separase                                                                                        | orange complex        |
| K00441 | frhB coenzyme F420 hydrogenase subunit beta                                                          | orange complex        |
| K13040 | ttrS two-component system, LuxR family, sensor histidine kinase TtrS                                 | orange complex        |
| K01026 | pct propionate CoA-transferase                                                                       | orange complex        |
| K02478 | K02478 two-component system, LytTR family, sensor kinase                                             | orange complex        |
| K00696 | E2.4.1.14 sucrose-phosphate synthase                                                                 | orange complex        |
| K01920 | gshB glutathione synthase                                                                            | orange complex        |
| K12368 | dppA dipeptide transport system substrate-binding protein                                            | orange complex        |
| K01141 | sbcB, exoI exodeoxyribonuclease I                                                                    | orange complex        |
| K12655 | OTUD5, DUBA OTU domain-containing protein 5                                                          | orange complex        |
| K06152 | E1.1.99.3G gluconate 2-dehydrogenase gamma chain                                                     | orange complex        |
| K13541 | cbiGH-cobJ cobalt-precorrin 5A hydrolase / precorrin-3B C17-methyltransferase                        | > 1 microbial complex |
| K01082 | cysQ, MET22, BPNT1 3'(2'), 5'-bisphosphate nucleotidase                                              | > 1 microbial complex |
| K10556 | lscA I-2 transport system permease protein                                                           | > 1 microbial complex |
| K09769 | K09769 uncharacterized protein                                                                       | > 1 microbial complex |
| K05966 | citG triphosphoribosyl-dephospho-CoA synthase                                                        | > 1 microbial complex |
| K13006 | wbqR UDP-perosamine 4-acetyltransferase                                                              | > 1 microbial complex |
| K09695 | nodI lipooligosaccharide transport system ATP-binding protein                                        | > 1 microbial complex |
| K11788 | ADE5 phosphoribosylamine--glycine ligase / phosphoribosylformylglycinamide cyclo-ligase              | > 1 microbial complex |
| K06883 | K06883 uncharacterized protein                                                                       | > 1 microbial complex |
| K00590 | E2.1.1.113 site-specific DNA-methyltransferase (cytosine-N4-specific)                                | > 1 microbial complex |
| K07319 | yhdJ adenine-specific DNA-methyltransferase                                                          | > 1 microbial complex |
| K13819 | K13819 NifU-like protein                                                                             | > 1 microbial complex |
| K13993 | HSP20 HSP20 family protein                                                                           | > 1 microbial complex |
| K01218 | gmuG mannan endo-1,4-beta-mannosidase                                                                | > 1 microbial complex |
| K01023 | assT arylsulfate sulfotransferase                                                                    | > 1 microbial complex |
| K09788 | prpF 2-methylaconitate isomerase                                                                     | > 1 microbial complex |
| K07133 | K07133 uncharacterized protein                                                                       | > 1 microbial complex |
| K00207 | DPYD dihydropyrimidine dehydrogenase (NADP+)                                                         | > 1 microbial complex |
| K01277 | DPP3 dipeptidyl-peptidase III                                                                        | > 1 microbial complex |
| K08676 | tri tricorin protease                                                                                | > 1 microbial complex |
| K11126 | TERT, EST2 telomerase reverse transcriptase                                                          | > 1 microbial complex |
| K07755 | AS3MT arsenite methyltransferase                                                                     | > 1 microbial complex |
| K07458 | vsr DNA mismatch endonuclease, patch repair protein                                                  | > 1 microbial complex |
| K01715 | crt enoyl-CoA hydratase                                                                              | > 1 microbial complex |
| K07240 | chrA chromate transporter                                                                            | > 1 microbial complex |
| K11381 | bkdA 2-oxoisovalerate dehydrogenase E1 component                                                     | > 1 microbial complex |
| K01860 | E5.5.1.7 chloromuconate cycloisomerase                                                               | > 1 microbial complex |
| K00074 | paaH, hbd, fadB, mmgB 3-hydroxybutyryl-CoA dehydrogenase                                             | > 1 microbial complex |

|        |                                                                                                     |                       |
|--------|-----------------------------------------------------------------------------------------------------|-----------------------|
| K01209 | abfA alpha-N-arabinofuranosidase                                                                    | > 1 microbial complex |
| K03649 | mug double-stranded uracil-DNA glycosylase                                                          | > 1 microbial complex |
| K01201 | GBA, srfJ glucosylceramidase                                                                        | > 1 microbial complex |
| K00842 | E2.6.1.-E, patB aminotransferase                                                                    | > 1 microbial complex |
| K12452 | ascC, ddhC, rfbH CDP-4-dehydro-6-deoxyglucose reductase, E1                                         | > 1 microbial complex |
| K01083 | E3.1.3.8 3-phytase                                                                                  | > 1 microbial complex |
| K00283 | gcvPB glycine dehydrogenase subunit 2                                                               | > 1 microbial complex |
| K00282 | gcvPA glycine dehydrogenase subunit 1                                                               | > 1 microbial complex |
| K04070 | pfIX putative pyruvate formate lyase activating enzyme                                              | > 1 microbial complex |
| K02588 | nifH nitrogenase iron protein NifH                                                                  | > 1 microbial complex |
| K05499 | cytR LacI family transcriptional regulator, repressor for deo operon, udp, cdd, tsx, nupC, and nupG | > 1 microbial complex |
| K07316 | mod adenine-specific DNA-methyltransferase                                                          | > 1 microbial complex |
| K03408 | cheW purine-binding chemotaxis protein CheW                                                         | > 1 microbial complex |
| K11184 | chr, crh catabolite repression HPr-like protein                                                     | > 1 microbial complex |
| K09883 | cobT cobaltochelataase CobT                                                                         | > 1 microbial complex |
| K02395 | flgJ flagellar protein FlgJ                                                                         | > 1 microbial complex |
| K02406 | fliC flagellin                                                                                      | > 1 microbial complex |
| K01761 | E4.4.1.11 methionine-gamma-lyase                                                                    | > 1 microbial complex |
| K07315 | rsbU_P phosphoserine phosphatase RsbU/P                                                             | > 1 microbial complex |
| K00042 | garR, glxR 2-hydroxy-3-oxopropionate reductase                                                      | > 1 microbial complex |
| K02388 | flgC flagellar basal-body rod protein FlgC                                                          | > 1 microbial complex |
| K02389 | flgD flagellar basal-body rod modification protein FlgD                                             | > 1 microbial complex |
| K02400 | flhA flagellar biosynthesis protein FlhA                                                            | > 1 microbial complex |
| K06441 | E1.12.7.2G ferredoxin hydrogenase gamma subunit                                                     | > 1 microbial complex |
| K01184 | E3.2.1.15 polygalacturonase                                                                         | > 1 microbial complex |
| K01709 | rfbG CDP-glucose 4,6-dehydratase                                                                    | > 1 microbial complex |
| K00087 | ygeS, xdhA xanthine dehydrogenase molybdenum-binding subunit                                        | > 1 microbial complex |
| K02419 | fliP flagellar biosynthetic protein FliP                                                            | > 1 microbial complex |
| K08589 | rgpA_B gingipain R                                                                                  | > 1 microbial complex |
| K00079 | CBR1 carbonyl reductase 1                                                                           | > 1 microbial complex |
| K02409 | fliF flagellar M-ring protein FliF                                                                  | > 1 microbial complex |
| K00318 | PRODH proline dehydrogenase                                                                         | > 1 microbial complex |
| K02556 | motA chemotaxis protein MotA                                                                        | > 1 microbial complex |
| K03412 | cheB two-component system, chemotaxis family, protein-glutamate methyltransferase/glutaminase       | > 1 microbial complex |
| K09710 | ybeB ribosome-associated protein                                                                    | > 1 microbial complex |
| K03415 | cheV two-component system, chemotaxis family, chemotaxis protein CheV                               | > 1 microbial complex |
| K00455 | hpaD, hpcB 3,4-dihydroxyphenylacetate 2,3-dioxygenase                                               | > 1 microbial complex |
| K07576 | K07576 metallo-beta-lactamase family protein                                                        | > 1 microbial complex |
| K00294 | E1.2.1.88 1-pyrroline-5-carboxylate dehydrogenase                                                   | > 1 microbial complex |
| K03409 | cheX chemotaxis protein CheX                                                                        | > 1 microbial complex |
| K08260 | cbiZ adenosylcobinamide hydrolase                                                                   | > 1 microbial complex |
| K00844 | HK hexokinase                                                                                       | > 1 microbial complex |
| K02488 | pleD two-component system, cell cycle response regulator                                            | > 1 microbial complex |
| K09798 | K09798 uncharacterized protein                                                                      | > 1 microbial complex |
| K04562 | fliG, fleN flagellar biosynthesis protein FliG                                                      | > 1 microbial complex |
| K00483 | hpaB 4-hydroxyphenylacetate 3-monooxygenase                                                         | > 1 microbial complex |
| K00899 | mtnK 5-methylthioribose kinase                                                                      | > 1 microbial complex |
| K00462 | bphC biphenyl-2,3-diol 1,2-dioxygenase                                                              | > 1 microbial complex |
| K06208 | aroH chorismate mutase                                                                              | > 1 microbial complex |
| K05988 | dexA dextranase                                                                                     | > 1 microbial complex |
| K10352 | MYH myosin heavy chain                                                                              | > 1 microbial complex |
| K02568 | napB cytochrome c-type protein NapB                                                                 | > 1 microbial complex |
| K04835 | mal methylaspartate ammonia-lyase                                                                   | > 1 microbial complex |
| K09459 | E4.1.1.82 phosphonopyruvate decarboxylase                                                           | > 1 microbial complex |
| K01841 | pepM phosphoenolpyruvate phosphomutase                                                              | > 1 microbial complex |
| K01376 | UFSP2 UFM1-specific protease 2                                                                      | > 1 microbial complex |
| K00109 | L2HGDH 2-hydroxyglutarate dehydrogenase                                                             | > 1 microbial complex |
| K07257 | spsF spore coat polysaccharide biosynthesis protein SpsF                                            | > 1 microbial complex |
| K01453 | nylB 6-aminohexanoate-oligomer exohydrolase                                                         | > 1 microbial complex |
| K13832 | aroDE, DHQ-SDH 3-dehydroquinate dehydratase / shikimate dehydrogenase                               | > 1 microbial complex |
| K13503 | trpEG anthranilate synthase                                                                         | > 1 microbial complex |
| K00819 | rocD, OAT ornithine--oxo-acid transaminase                                                          | > 1 microbial complex |
| K03170 | topG, rgy reverse gyrase                                                                            | > 1 microbial complex |
| K02396 | flgK flagellar hook-associated protein 1 FlgK                                                       | > 1 microbial complex |
| K07662 | cpxR two-component system, OmpR family, response regulator CpxR                                     | > 1 microbial complex |
| K01813 | rhaA L-rhamnose isomerase                                                                           | > 1 microbial complex |
| K07443 | ybaZ methylated-DNA-protein-cysteine methyltransferase related protein                              | > 1 microbial complex |
| K11333 | bchX 3,8-divinyl chlorophyllide a/chlorophyllide a reductase subunit X                              | > 1 microbial complex |
| K04566 | lysK lysyl-tRNA synthetase, class I                                                                 | > 1 microbial complex |
| K00043 | gbd 4-hydroxybutyrate dehydrogenase                                                                 | > 1 microbial complex |
| K11444 | wspR two-component system, chemotaxis family, response regulator WspR                               | > 1 microbial complex |
| K07318 | K07318 adenine-specific DNA-methyltransferase                                                       | > 1 microbial complex |

|        |                                                                                                     |                       |
|--------|-----------------------------------------------------------------------------------------------------|-----------------------|
| K01034 | atoD acetate CoA/acetoacetate CoA-transferase alpha subunit                                         | > 1 microbial complex |
| K02407 | fliD flagellar hook-associated protein 2                                                            | > 1 microbial complex |
| K02482 | K02482 two-component system, NtrC family, sensor kinase                                             | > 1 microbial complex |
| K01682 | acnB aconitate hydratase 2 / 2-methylisocitrate dehydratase                                         | > 1 microbial complex |
| K01442 | E3.5.1.24 choloylglycine hydrolase                                                                  | > 1 microbial complex |
| K01127 | E3.1.4.50 glycosylphosphatidylinositol phospholipase D                                              | > 1 microbial complex |
| K07317 | K07317 adenine-specific DNA-methyltransferase                                                       | > 1 microbial complex |
| K13016 | wbpB UDP-N-acetyl-2-amino-2-deoxyglucuronate dehydrogenase                                          | > 1 microbial complex |
| K12820 | DHX15, PRP43 pre-mRNA-splicing factor ATP-dependent RNA helicase DHX15/PRP43                        | > 1 microbial complex |
| K13830 | ARO1 pentafunctional AROM polypeptide                                                               | > 1 microbial complex |
| K06917 | selU tRNA 2-selenouridine synthase                                                                  | > 1 microbial complex |
| K01047 | PLA2G, SPLA2 secretory phospholipase A2                                                             | > 1 microbial complex |
| K13941 | folKP 2-amino-4-hydroxy-6-hydroxymethylidihydropteridine diphosphokinase / dihydropteroate synthase | > 1 microbial complex |
| K02394 | flgI flagellar P-ring protein precursor FlgI                                                        | > 1 microbial complex |
| K11541 | URA2 carbamoyl-phosphate synthase / aspartate carbamoyltransferase                                  | > 1 microbial complex |
| K02481 | K02481 two-component system, NtrC family, response regulator                                        | > 1 microbial complex |
| K01062 | PLA2G7, PAFAH platelet-activating factor acetylhydrolase                                            | > 1 microbial complex |
| K03646 | tolA colicin import membrane protein                                                                | > 1 microbial complex |
| K07452 | mcrB 5-methylcytosine-specific restriction enzyme B                                                 | > 1 microbial complex |
| K03955 | NDUFAB1 NADH dehydrogenase (ubiquinone) 1 alpha/beta subcomplex 1                                   | > 1 microbial complex |
| K00476 | ASPH aspartate beta-hydroxylase                                                                     | > 1 microbial complex |
| K08077 | NUDT14 UDP-sugar diphosphatase                                                                      | > 1 microbial complex |
| K09835 | crtISO, crtH prolycopene isomerase                                                                  | > 1 microbial complex |
| K13960 | UBE2T, HSPC150 ubiquitin-conjugating enzyme E2 T                                                    | > 1 microbial complex |
| K07310 | ynfF Tat-targeted selenate reductase subunit YnfF                                                   | > 1 microbial complex |
| K12357 | NEU2_3_4 sialidase-2/3/4                                                                            | > 1 microbial complex |
| K00273 | DAO, aao D-amino-acid oxidase                                                                       | > 1 microbial complex |
| K04086 | clpL ATP-dependent Clp protease ATP-binding subunit ClpL                                            | > 1 microbial complex |
| K00364 | E1.7.1.7, guaC GMP reductase                                                                        | > 1 microbial complex |
| K00076 | hdhA 7-alpha-hydroxysteroid dehydrogenase                                                           | > 1 microbial complex |
| K14261 | alaC alanine-synthesizing transaminase                                                              | > 1 microbial complex |
| K10906 | recE exodeoxyribonuclease VIII                                                                      | > 1 microbial complex |
| K01390 | iga IgA-specific metalloendopeptidase                                                               | > 1 microbial complex |
| K06674 | SMC2 structural maintenance of chromosome 2                                                         | > 1 microbial complex |
| K11994 | DNASE1 deoxyribonuclease-1                                                                          | > 1 microbial complex |
| K12140 | hyfE hydrogenase-4 component E                                                                      | > 1 microbial complex |
| K07151 | STT3 dolichyl-diphosphooligosaccharide---protein glycosyltransferase                                | > 1 microbial complex |
| K12141 | hyfF hydrogenase-4 component F                                                                      | > 1 microbial complex |
| K03832 | tonB periplasmic protein TonB                                                                       | > 1 microbial complex |
| K03782 | katG catalase-peroxidase                                                                            | > 1 microbial complex |
| K05352 | tarJ ribitol-5-phosphate 2-dehydrogenase (NADP+)                                                    | > 1 microbial complex |
| K11401 | SAS2 histone acetyltransferase SAS2                                                                 | > 1 microbial complex |
| K03483 | mtlR mannitol operon transcriptional antiterminator                                                 | > 1 microbial complex |
| K13678 | cpoA 1,2-diacylglycerol-3-alpha-glucose alpha-1,2-galactosyltransferase                             | > 1 microbial complex |
| K01464 | DPYS, dht, hydA dihydropyrimidinase                                                                 |                       |
| K02566 | nagD NagD protein                                                                                   | purple complex        |
| K01804 | araA L-arabinose isomerase                                                                          | purple complex        |
| K13498 | trpCF indole-3-glycerol phosphate synthase / phosphoribosylanthranilate isomerase                   | purple complex        |
| K10546 | ABC.GGU.S, chvE putative multiple sugar transport system substrate-binding protein                  | purple complex        |
| K10548 | ABC.GGU.A, gguA putative multiple sugar transport system ATP-binding protein                        | purple complex        |
| K10547 | ABC.GGU.P, gguB putative multiple sugar transport system permease protein                           | purple complex        |
| K06182 | rIuF 23S rRNA pseudouridine2604 synthase                                                            | purple complex        |
| K01720 | prpD 2-methylcitrate dehydratase                                                                    | purple complex        |
| K00086 | dhaT 1,3-propanediol dehydrogenase                                                                  | purple complex        |
| K12984 | waaE, kdtX (heptosyl)LPS beta-1,4-glucosyltransferase                                               | purple complex        |
| K08100 | E1.3.3.5 bilirubin oxidase                                                                          | purple complex        |
| K10038 | glnQ glutamine transport system ATP-binding protein                                                 | purple complex        |
| K09162 | cid chlorite dismutase                                                                              | purple complex        |
| K03638 | moaB molybdopterin adenyltransferase                                                                | purple complex        |
| K01474 | hyuB N-methylhydantoinase B                                                                         | purple complex        |
| K02068 | ABC.X2.A putative ABC transport system ATP-binding protein                                          | purple complex        |
| K01470 | E3.5.2.10 creatinine amidohydrolase                                                                 | purple complex        |
| K07753 | PECR peroxisomal trans-2-enoyl-CoA reductase                                                        | green complex         |
| K13713 | purCD fusion protein PurCD                                                                          | green complex         |
| K13059 | nahK, InpB N-acetylhexosamine 1-kinase                                                              | green complex         |
| K02636 | petC cytochrome b6-f complex iron-sulfur subunit                                                    | green complex         |
| K07664 | baeR, smeR two-component system, OmpR family, response regulator BaeR                               | green complex         |
| K07704 | lytS two-component system, LytTR family, sensor histidine kinase LytS                               | green complex         |
| K00809 | DHPS, dys deoxyhypusine synthase                                                                    | green complex         |
| K13800 | CMPK1, UMPK UMP-CMP kinase                                                                          | green complex         |
| K00285 | dadA D-amino-acid dehydrogenase                                                                     | green complex         |
| K02558 | mpl UDP-N-acetylmuramate: L-alanyl-gamma-D-glutamyl-meso-diaminopimelate ligase                     | green complex         |

|        |                                                                                                |                |
|--------|------------------------------------------------------------------------------------------------|----------------|
| K12137 | hyfB hydrogenase-4 component B                                                                 | green complex  |
| K11358 | yhdR aspartate aminotransferase                                                                | outlier        |
| K02299 | cyoC cytochrome o ubiquinol oxidase subunit III                                                | outlier        |
| K02586 | nifD nitrogenase molybdenum-iron protein alpha chain                                           | outlier        |
| K03187 | ureE urease accessory protein                                                                  | outlier        |
| K03188 | ureF urease accessory protein                                                                  | outlier        |
| K08253 | E2.7.10.2 non-specific protein-tyrosine kinase                                                 | outlier        |
| K01429 | ureB urease subunit beta                                                                       | outlier        |
| K01721 | nthA nitrile hydratase subunit alpha                                                           | outlier        |
| K00299 | ssuE FMN reductase                                                                             | outlier        |
| K11422 | SETD1, SET1 histone-lysine N-methyltransferase SETD1                                           | outlier        |
| K02193 | ccmA heme exporter protein A                                                                   | outlier        |
| K03411 | cheD chemotaxis protein CheD                                                                   | outlier        |
| K03410 | cheC chemotaxis protein CheC                                                                   | outlier        |
| K11782 | mqnA chorismate dehydratase                                                                    | outlier        |
| K03006 | RPB1, POLR2A DNA-directed RNA polymerase II subunit RPB1                                       | outlier        |
| K00137 | prf aminobutyraldehyde dehydrogenase                                                           | outlier        |
| K10615 | HERC4 E3 ubiquitin-protein ligase HERC4                                                        | outlier        |
| K01403 | MMP9 matrix metalloproteinase-9 (gelatinase B)                                                 | outlier        |
| K02408 | fliE flagellar hook-basal body complex protein FliE                                            | outlier        |
| K00317 | dmd-tmd dimethylamine/trimethylamine dehydrogenase                                             | outlier        |
| K00841 | patA aminotransferase                                                                          | yellow complex |
| K01919 | gshA glutamate--cysteine ligase                                                                | yellow complex |
| K01641 | E2.3.3.10 hydroxymethylglutaryl-CoA synthase                                                   | yellow complex |
| K02819 | PTS-Tre-EIIC, treB PTS system, trehalose-specific IIC component                                | yellow complex |
| K07015 | K07015 uncharacterized protein                                                                 | yellow complex |
| K08484 | PTS-EI.PTSP, ptsP phosphotransferase system, enzyme I, PtsP                                    | yellow complex |
| K02911 | RP-L32, MRPL32, rpmF large subunit ribosomal protein L32                                       | yellow complex |
| K03366 | butA, budC meso-butanediol dehydrogenase / (S,S)-butanediol dehydrogenase / diacetyl reductase | yellow complex |
| K02744 | PTS-Aga-EIIA, agaF PTS system, N-acetylgalactosamine-specific IIA component                    | yellow complex |
| K02240 | comFA competence protein ComFA                                                                 | yellow complex |
| K03476 | ulaG L-ascorbate 6-phosphate lactonase                                                         | yellow complex |
| K12997 | rgpB rhamnosyltransferase                                                                      | yellow complex |
| K03700 | recU recombination protein U                                                                   | yellow complex |
| K04045 | hscC molecular chaperone HscC                                                                  | yellow complex |
| K01635 | lacD tagatose 1,6-diphosphate aldolase                                                         | yellow complex |
| K02082 | agaS tagatose-6-phosphate ketose/aldose isomerase                                              | yellow complex |
| K08310 | nudB, ntpA dihydroneopterin triphosphate diphosphatase                                         | yellow complex |
| K07078 | K07078 uncharacterized protein                                                                 | yellow complex |
| K03693 | pbp1b penicillin-binding protein 1B                                                            | yellow complex |
| K05362 | murE UDP-N-acetylmuramoyl-L-alanyl-D-glutamate-L-lysine ligase                                 | yellow complex |
| K07104 | catE catechol 2,3-dioxygenase                                                                  | yellow complex |
| K03342 | pabBC para-aminobenzoate synthetase / 4-amino-4-deoxychorismate lyase                          | yellow complex |
| K01281 | pepX X-Pro dipeptidyl-peptidase                                                                | yellow complex |
| K03471 | rnhC ribonuclease HIII                                                                         | yellow complex |
| K02771 | PTS-Fru1-EIID, levG PTS system, fructose-specific IID component                                | yellow complex |
| K00712 | tagE poly(glycerol-phosphate) alpha-glucosyltransferase                                        | yellow complex |
| K05363 | murM serine/alanine adding enzyme                                                              | yellow complex |
| K12556 | pbp2X penicillin-binding protein 2X                                                            | yellow complex |
| K03346 | dnaB replication initiation and membrane attachment protein                                    | yellow complex |
| K08234 | yaeR glyoxylase I family protein                                                               | yellow complex |
| K01220 | E3.2.1.85, lacG 6-phospho-beta-galactosidase                                                   | yellow complex |
| K08643 | zmpB zinc metalloprotease ZmpB                                                                 | yellow complex |
| K02786 | PTS-Lac-EIIA, lacF PTS system, lactose-specific IIA component                                  | yellow complex |
| K13549 | btrN 2-deoxy-scyllo-inosamine dehydrogenase (SAM-dependent)                                    | yellow complex |
| K12663 | ECH1 Delta3,5-Delta2,4-dienoyl-CoA isomerase                                                   | yellow complex |
| K07706 | agrC, blpH, fsrC two-component system, LytTR family, sensor histidine kinase AgrC              | yellow complex |
| K01699 | pduC propanediol dehydratase large subunit                                                     | yellow complex |
| K03825 | yhhY putative acetyltransferase                                                                | yellow complex |
| K11209 | yghU, yfcG GSH-dependent disulfide-bond oxidoreductase                                         | yellow complex |
| K02791 | PTS-MalGlc-EIIC, malX PTS system, maltose/glucose-specific IIC component                       | yellow complex |
| K10681 | saeS two-component system, OmpR family, sensor histidine kinase SaeS                           | yellow complex |
| K03697 | clpE ATP-dependent Clp protease ATP-binding subunit ClpE                                       | yellow complex |
| K08660 | CNDP2 cytosolic nonspecific dipeptidase                                                        | yellow complex |
| K01541 | E3.6.3.10 H+/K+-exchanging ATPase                                                              | yellow complex |
| K01261 | pepA glutamyl aminopeptidase                                                                   | yellow complex |
| K01215 | dexB glucan 1,6-alpha-glucosidase                                                              | yellow complex |
| K01230 | MAN1 mannosyl-oligosaccharide alpha-1,2-mannosidase                                            | yellow complex |
| K02614 | paal acyl-CoA thioesterase                                                                     | yellow complex |
| K02788 | PTS-Lac-EIIC, lacE PTS system, lactose-specific IIC component                                  | yellow complex |
| K00158 | E1.2.3.3, poxL pyruvate oxidase                                                                | yellow complex |
| K11204 | GCLC glutamate--cysteine ligase catalytic subunit                                              | yellow complex |

|        |                                                                            |                |
|--------|----------------------------------------------------------------------------|----------------|
| K00690 | E2.4.1.7 sucrose phosphorylase                                             | yellow complex |
| K03095 | sprL SprT-like protein                                                     | yellow complex |
| K02236 | comC leader peptidase (prepilin peptidase) / N-methyltransferase           | yellow complex |
| K00669 | AANAT arylalkylamine N-acetyltransferase                                   | yellow complex |
| K00687 | pbp2B, penA penicillin-binding protein 2B                                  | yellow complex |
| K01598 | PPCDC, coaC phosphopantothienoylcysteine decarboxylase                     | yellow complex |
| K05593 | aadK aminoglycoside 6-adenylyltransferase                                  | yellow complex |
| K13522 | K13522, nadM bifunctional NMN adenylyltransferase/nudix hydrolase          | yellow complex |
| K12996 | rgpA rhamnosyltransferase                                                  | yellow complex |
| K11067 | NAGS N-acetylglutamate synthase                                            | yellow complex |
| K00105 | E1.1.3.21 alpha-glycerophosphate oxidase                                   | yellow complex |
| K12554 | murN alanine adding enzyme                                                 | yellow complex |
| K01922 | PPCS, COAB phosphopantothenate---cysteine ligase (ATP)                     | yellow complex |
| K00093 | mdh methanol dehydrogenase                                                 | yellow complex |
| K02745 | PTS-Aga-EIIB, agaV PTS system, N-acetylglactosamine-specific IIB component | yellow complex |
| K01150 | endA deoxyribonuclease I                                                   | yellow complex |
| K00897 | aphA kanamycin kinase                                                      | yellow complex |
| K02747 | PTS-Aga-EIID, agaE PTS system, N-acetylglactosamine-specific IID component | yellow complex |
| K03827 | yjaB putative acetyltransferase                                            | yellow complex |
